# Supplementary material for: The NeuroBioBank Whole-Genome Catalog: Sequencing from human brain donors with central nervous system disorders
Source: bioRxiv or medRxiv preprint supplement (doi:10.1101/2024.08.29.24312734), 2024-08-30

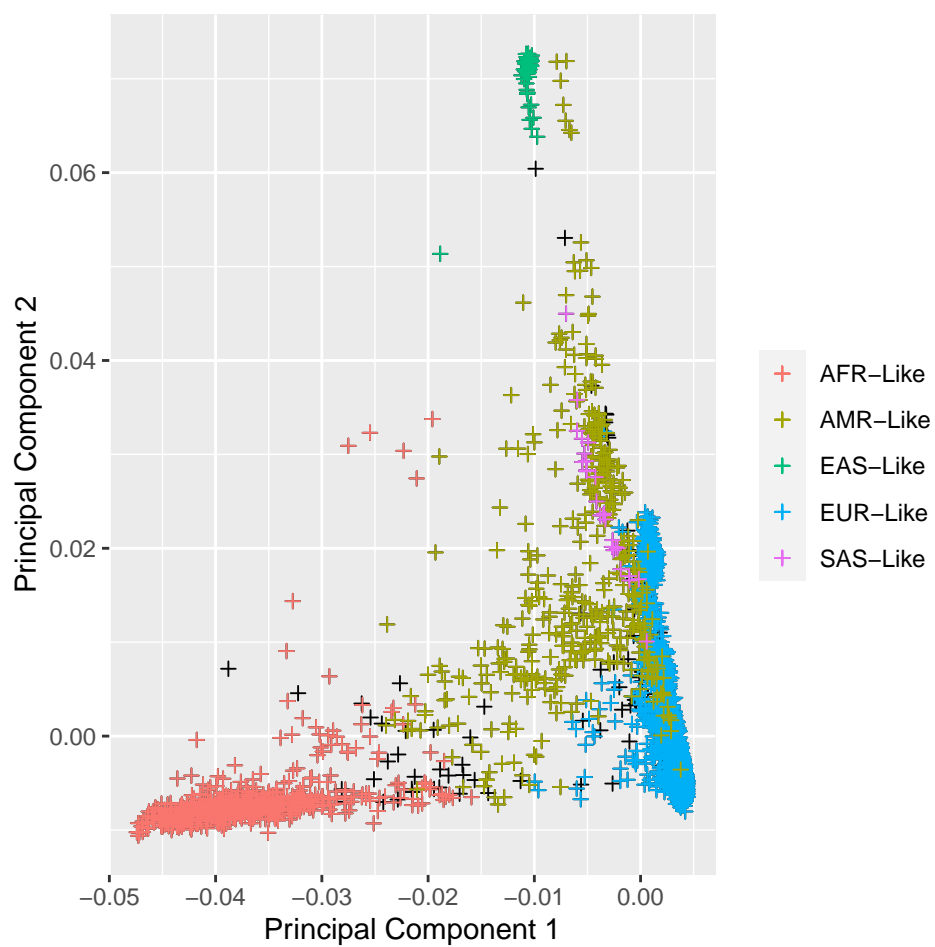

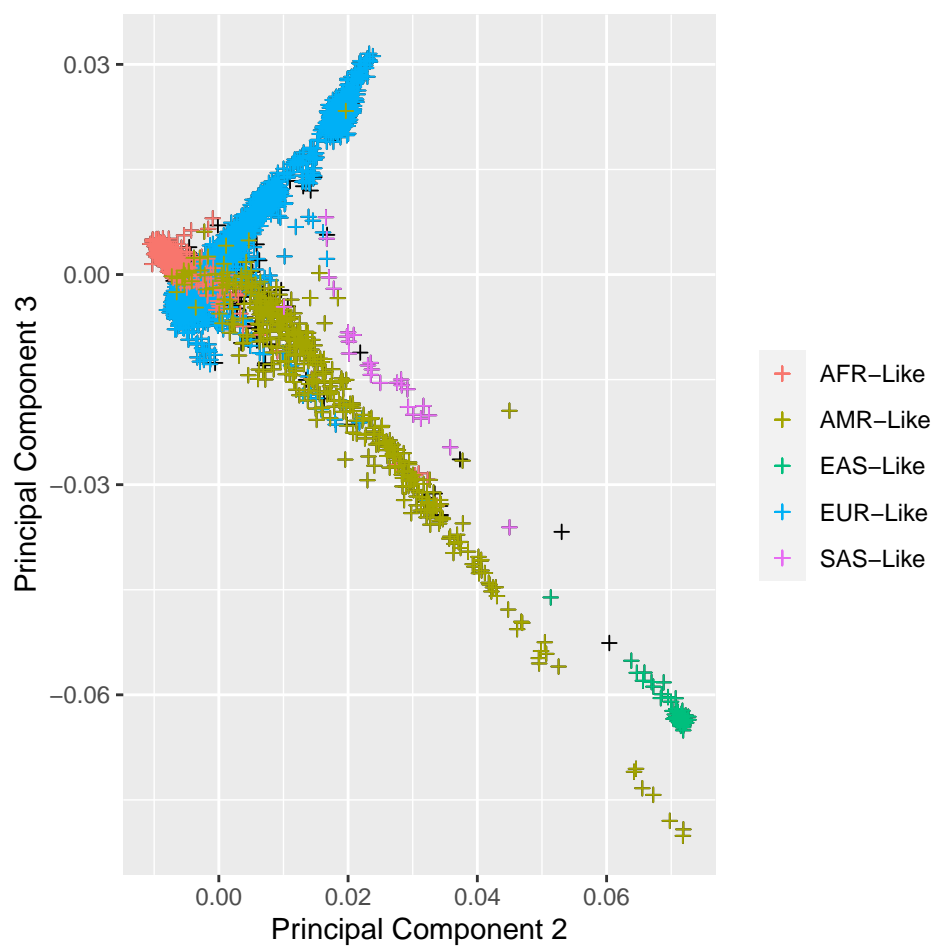

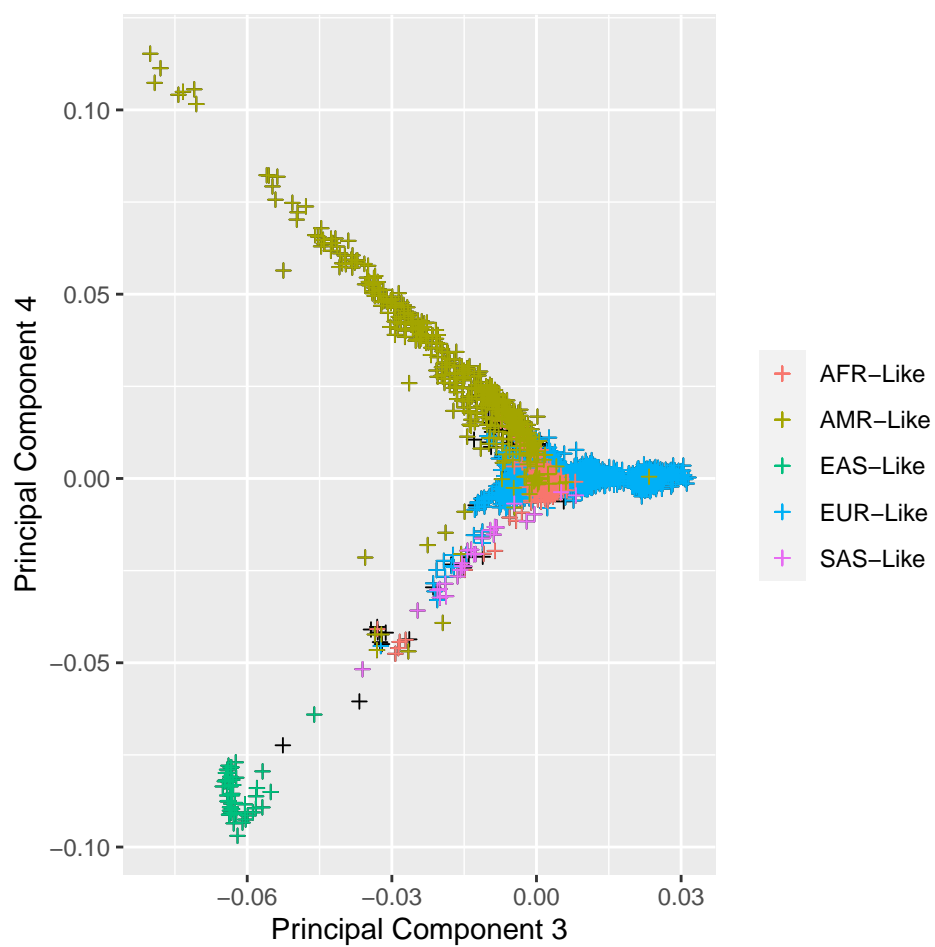

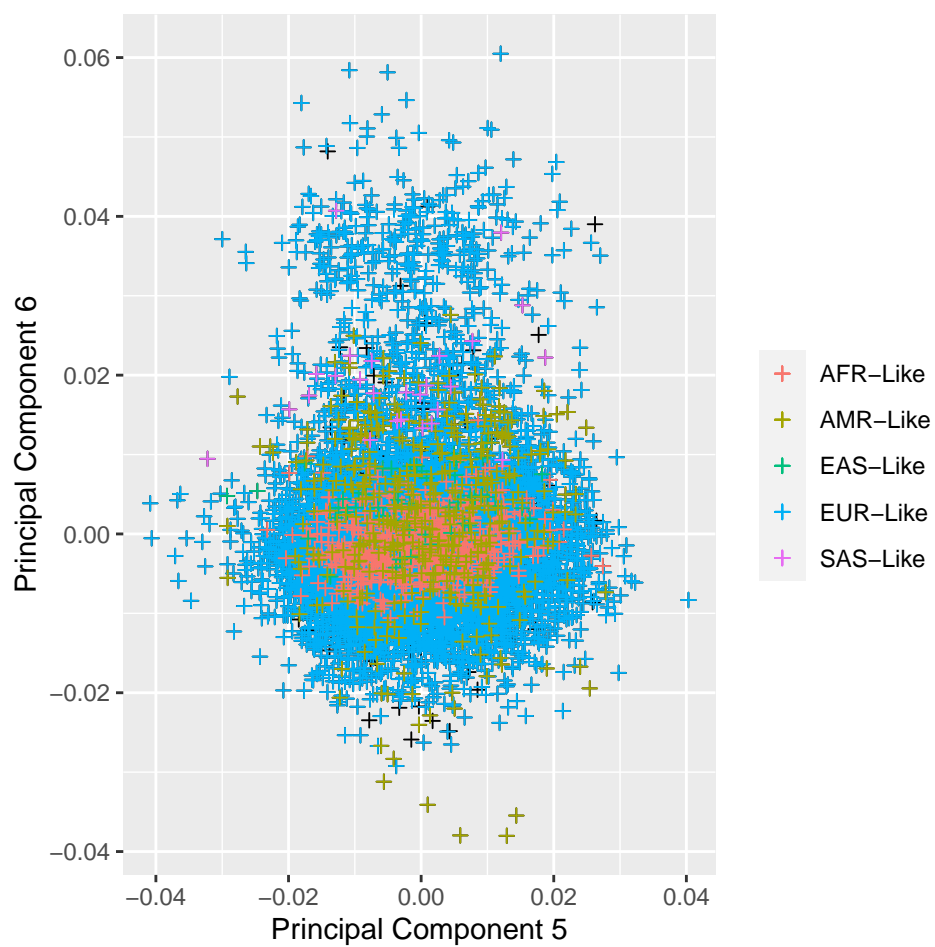

Supplement: Supplementary file [file media-2.pdf]
